# Supplementary material
Source: PubMed Central journal article supplement (PMC4187626)
Supplement: EC.00148-14_zek999094332so1.pdf [file EC.00148-14_zek999094332so1.pdf]

**Table S1. *C. albicans* strains.**

| Strain                       | Genotype                                                                               | Source                                       |
|------------------------------|----------------------------------------------------------------------------------------|----------------------------------------------|
| CAI4                         | <i>Δura3::imm434/Δura3::imm434</i>                                                     | (1)                                          |
| CAF2                         | <i>URA3/ura3Δ::λimm434</i>                                                             | (1)                                          |
| SN152                        | CAI4 with<br><i>iro1::IRO1/iro1::λimm434 his1::hisG/his1::hisG leu2/leu2 arg4/arg4</i> | (2)                                          |
| <i>efg1Δ/Δ</i>               | CAI4 with <i>efg1Δ::hisG/efg1Δ::hisG-URA3-hisG</i>                                     | (3)                                          |
| <i>efg1Δ/pEFG1</i>           | CAI4 with <i>efg1::hisG/efg1::[EFG1p-HA-EFG1-URA3]</i>                                 | (4)                                          |
| Efg1-Myc                     | as CAI4 <i>efg1::hisG/EFG1-MYC-URA3</i>                                                | (5)                                          |
| Efg1-T179A                   | as CAI4 with <i>efg1::hisG/EFG1T179A-MYC-URA3</i>                                      | (5)                                          |
| Efg1-T179D                   | as CAI4 with <i>efg1::hisG/EFG1T179D-MYC-URA3</i>                                      | (5)                                          |
| <i>tpk1Δ/Δ</i>               | as CAI4 with <i>tpk1Δ::hisG-URA3-hisG/tpk1Δ::hisG</i>                                  | (6)                                          |
| <i>tpk2Δ/Δ</i>               | as CAI4 with <i>tpk2Δ::hisG/tpk2Δ::hisG-URA3-hisG</i>                                  | (7)                                          |
| <i>ace2Δ/Δ</i>               | <i>ura3Δ::λimm434/ura3::λimm434 his1::hisG/his1::hisG ace2Δ::HIS1/ace2Δ::URA3</i>      | (8)                                          |
| <i>ace2Δ/Δ</i>               | as SN152 with <i>ace2Δ::LEU2/ace2Δ::HIS1</i>                                           | (9)                                          |
| Ace2-Myc                     | as CAI4 with <i>ACE2-MYC-URA/ACE2</i>                                                  | This Work                                    |
| <i>tpk1Δ/TPK1-as tpk2Δ/Δ</i> | as CAI4 with <i>tpk1Δ::hisG/TPK-as::URA3 tpk2Δ::hisG/tpk2Δ::hisG</i>                   | Generous gift from C. d'Enfert (unpublished) |
| <i>czf1Δ/Δ</i>               | as SN152 with <i>czf1Δ::LEU2/czf1Δ::HIS1</i>                                           | (9)                                          |
| <i>brg1Δ/Δ</i>               | as SN152 with <i>brg1Δ::LEU2/brg1Δ::HIS1</i>                                           | (9)                                          |
| <i>tec1Δ/Δ</i>               | as SN152 with <i>tec1Δ::LEU2/tec1Δ::HIS1</i>                                           | (9)                                          |
| <i>upc2Δ/Δ</i>               | as SN152 with <i>upc2Δ::LEU2/upc2Δ::HIS1</i>                                           | (9)                                          |
| BWP17                        | <i>ura3::imm434/ura3::imm434 iro1/iro1::imm434 his1::hisG/his1::hisG arg4/arg4</i>     | (10)                                         |
| DAY286                       | as BWP17 with <i>ARG4:URA3:arg4::hisG/arg4::hisG his1::hisG/his1::hisG</i>             | (11)                                         |
| <i>ada2Δ/Δ</i>               | as BWP17 with <i>ada2Δ::ARG4/ada2Δ::URA3</i>                                           | (11)                                         |
| <i>snf5Δ/Δ</i>               | as BWP17 with <i>snf5Δ::ARG4/snf5::URA3</i>                                            | (12)                                         |
| pEFG1-GFP                    | as CAI4 with <i>EFG1::EFG1pr-GFP</i>                                                   | (13)                                         |
| pEFG1-GFP<br>pACE2-mCherry   | as CAI4 with <i>EFG1::EFG1pr-GFP ACE2::ACE2pr-mCherry</i>                              | This Study                                   |
| Brg1-Myc                     | as SN152 with <i>BRG1-13XMyc-FRT-FLP-SAT-FRT/BRG1</i>                                  | (14)                                         |
| Tec1-Myc                     | as CAF2 with <i>TEC1-13XMyc-NAT/TEC1</i>                                               | This study                                   |

## Table S1. References

1. **Fonzi WA, Irwin MY.** 1993. Isogenic strain construction and gene mapping in *Candida albicans*. *Genetics* **134**:717-734.
2. **Noble SM, Johnson AD.** 2005. Strains and strategies for large-scale gene deletion studies of the diploid human fungal pathogen *Candida albicans*. *Eukaryot. Cell* **4**:298-309.
3. **Lo HJ, Kohler JR, DiDomenico B, Loebenberg D, Cucciapuoti A, Fink GR.** 1997. Nonfilamentous *C. albicans* mutants are avirulent. *Cell* **90**:939-949.
4. **Noffz CS, Liedschulte V, Lengeler K, Ernst JF.** 2008. Functional mapping of the *Candida albicans* Efg1 regulator. *Eukaryot. Cell* **7**:881-893.
5. **Wang A, Raniga PP, Lane S, Lu Y, Liu H.** 2009. Hyphal chain formation in *Candida albicans*: Cdc28-Hgc1 phosphorylation of Efg1 represses cell separation genes. *Mol. Cell. Biol.* **29**:4406-4416.
6. **Bockmühl DP, Krishnamurthy S, Gerads M, Sonneborn A, Ernst JF.** 2001. Distinct and redundant roles of the two protein kinase A isoforms Tpk1p and Tpk2p in morphogenesis and growth of *Candida albicans*. *Mol. Microbiol.* **42**:1243-1257.
7. **Sonneborn A, Bockmühl DP, Gerads M, Kurpanek K, Sanglard D, Ernst JF.** 2000. Protein kinase A encoded by *TPK2* regulates dimorphism of *Candida albicans*. *Mol. Microbiol.* **35**:386-396.
8. **Mulhern SM, Logue ME, Butler G.** 2006. *Candida albicans* transcription factor Ace2 regulates metabolism and is required for filamentation in hypoxic conditions. *Eukaryot. Cell* **5**:2001-2013.
9. **Homann OR, Dea J, Noble SM, Johnson AD.** 2009. A phenotypic profile of the *Candida albicans* regulatory network. *PLoS Genet.* **5**:e1000783.
10. **Wilson RB, Davis D, Mitchell AP.** 1999. Rapid hypothesis testing with *Candida albicans* through gene disruption with short homology regions. *J. Bacteriol.* **181**:1868-1874.
11. **Bruno VM, Kalachikov S, Subaran R, Nobile CJ, Kyratsous C, Mitchell AP.** Control of the *C. albicans* cell wall damage response by transcriptional regulator Cas5. *PLoS Pathog.* **2**:e21.
12. **Finkel JS, Xu W, Huang D, Hill EM, Desai JV, Woolford CA, Nett JE, Taff H, Norice CT, Andes DR, Lanni F, Mitchell AP.** 2012. Portrait of *Candida albicans* adherence regulators. *PLoS Pathog.* **8**:e1002525.
13. **Pierce JV, Kumamoto CA.** 2012. Variation in *Candida albicans* *EFG1* expression enables host-dependent changes in colonizing fungal populations. *mBio* **3**:e00117-12.
14. **Nobile CJ, Fox EP, Nett JE, Sorrells TR, Mitrovich QM, Hernday AD, Tuch BB, Andes DR, Johnson AD.** A recently evolved transcriptional network controls biofilm development in *Candida albicans*. *Cell* **148**:126-138.

# Figure S1

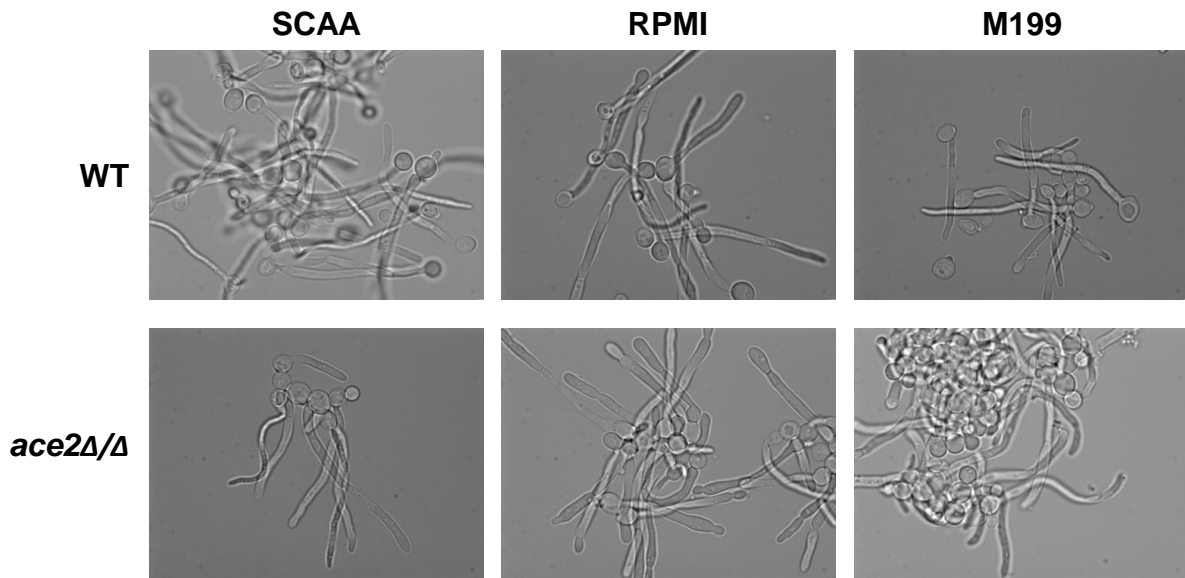

FIG S1 Hyphae formation is similar to WT in *ace2Δ/Δ* mutants in most inducing conditions.

Micrographs of WT (CAF2) and *ace2Δ/Δ* strains after 3 hr incubation in the indicated medium at 37°C.
